# Supplementary material for: Cinnamon Leaf and Clove Essential Oils Are Potent Inhibitors of Candida albicans Virulence Traits
Source: MDPI journal article supplement (doi:10.3390/microorganisms10101989), 2022-10-08
Supplement: s1 [file s1]

# Cinnamon leaf and clove essential oils are potent inhibitors of *Candida albicans* virulence traits

Zinnat Shahina, Ali Molaeitabari, Taranum Sultana, Tanya E. S. Dahms

## Supplementary data

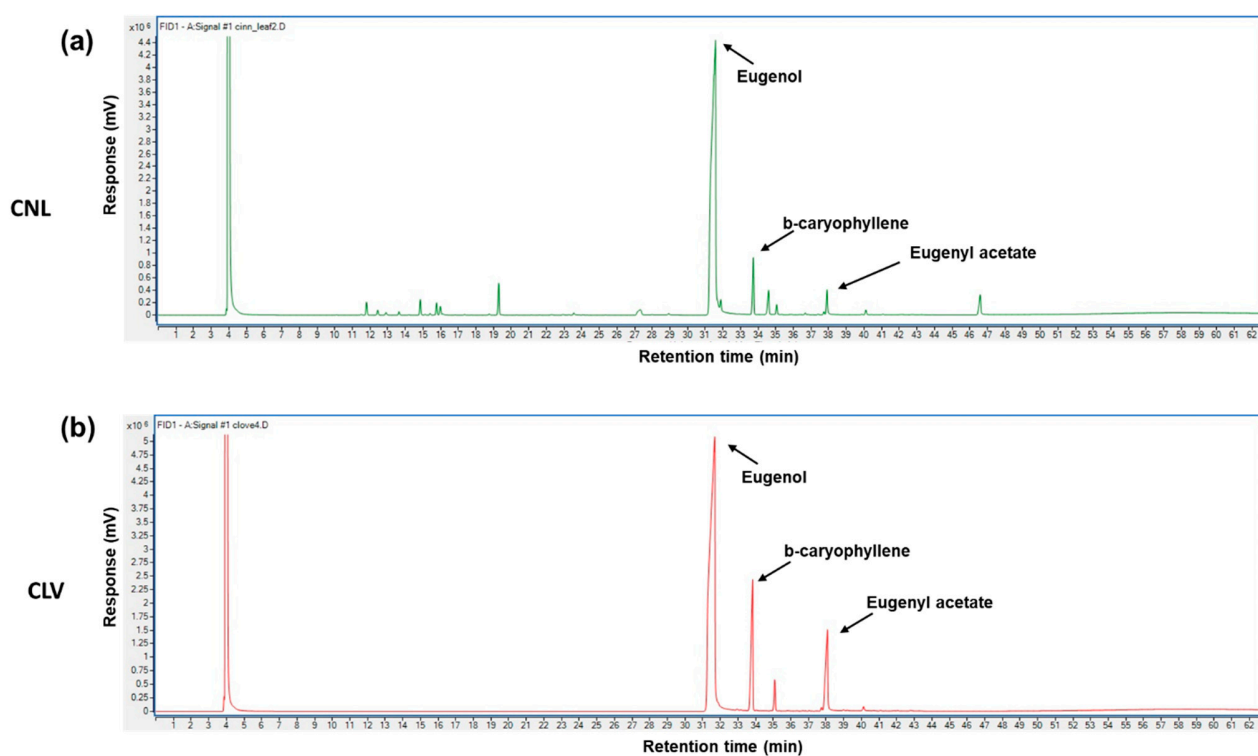

**Figure S1.**GC-MS chromatogram of CNL and CLV EOs.

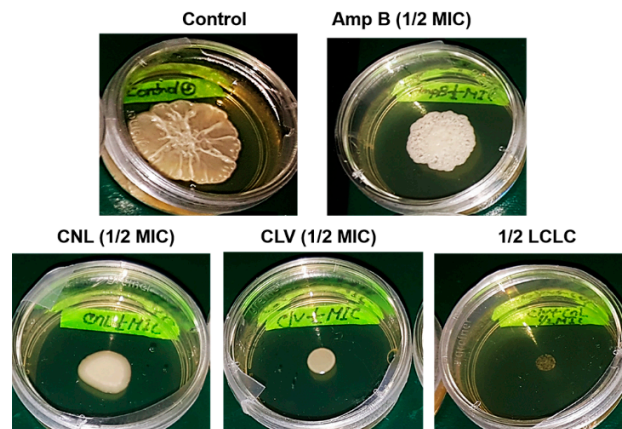

**Figure S2.** Inhibition of hyphal morphogenesis of *C. albicans* RSY150 in the presence of CNL, CLV (1/2 MIC and 1/4 MIC) and the two at 1/2 LCLC on spider media agar plates. Images were recorded using a digital camera.

**Table S1.** List of strains and clinical isolates used in this study.

| Strains                       | Genotype/ Isolate description                                                                               | References                                  |
|-------------------------------|-------------------------------------------------------------------------------------------------------------|---------------------------------------------|
| RSY150 <sup>a</sup>           | <i>TUB2-GFP-SAT1/TUB2<sup>+</sup> HTB1-RFP-ARG4<sup>+</sup>/HTB1<sup>+</sup> arg4<sup>-/-</sup></i>         | [1]                                         |
| ATCC 10231                    | Clinical background strain                                                                                  | RQHR <sup>b</sup> ,<br>Regina<br>SK, Canada |
| SC5314                        | Parent strain for knock out mutant below                                                                    | [2]                                         |
| <i>C. albicans</i><br>(1 – 3) | Clinical isolates; 2 genital and 1 blood strains                                                            | RQHR, Regina,<br>SK, Canada                 |
|                               | <b><i>C. albicans</i> knockout mutants</b>                                                                  |                                             |
| <b>Knockout mutant</b>        | <b>Function/ Genotype description</b>                                                                       |                                             |
| <i>hwp1Δ/HWP1<sup>+</sup></i> | <i>his3::hisG/his3::hisGleu2::tetRGAL4AD-URA3/LEU2-HWP1</i>                                                 | [3]                                         |
| 1467 ( <i>als1Δ/Δ</i> )       | <i>iro1-ura3Δ : : λimm<sup>434</sup>/iro1-ura3Δ : : λimm<sup>434</sup> als1saΔ/als1laΔ-URA3<sup>c</sup></i> | [4]                                         |
| 1843 ( <i>als3Δ/Δ</i> )       | <i>iro1-ura3Δ : : λimm<sup>434</sup>/iro1-ura3Δ : : λimm<sup>434</sup> als3laΔ/als3saΔ-URA3<sup>c</sup></i> | [4]                                         |
| HLC67 ( <i>efg1Δ/Δ</i> )      | <i>CAI4 efg1::hisG/efg1::hisG MTLα/α<sup>d</sup></i>                                                        | [5]                                         |

<sup>a</sup>The full genotype at the auxotrophic markers for RSY is as follows: *his1::hisG/his1::hisGleu2::hisG/leu2::hisGarg4::hisG/arg4::hisGura3::imm434 iro1::IRO1/iro1::imm434*, as described by Sherwood and Bennett, 2008.

<sup>b</sup>RQHR - Regina Qu'Appelle Health Region

<sup>c</sup>Alleles of ALS genes are marked with LA to designate the large allele or SA for the small allele in strain SC5314.

<sup>d</sup>MTL - Mating type like

1. Sherwood, R.K.; Bennett, R.J. Microtubule Motor Protein Kar3 Is Required for Normal Mitotic Division and Morphogenesis in *Candida Albicans*. *Eukaryot. Cell* **2008**, *7*, 1460–1474, doi:10.1128/EC.00138-08.
2. Gillum, A.M.; Tsay, E.Y.H.; Kirsch, D.R. Isolation of the *Candida Albicans* Gene for Orotidine-5'-Phosphate Decarboxylase by Complementation of *S. Cerevisiae* Ura3 and *E. Coli* PyrF Mutations. *MGG Mol. Gen. Genet.* **1984**, *198*, 179–182, doi:10.1007/BF00328721.
3. Roemer, T.; Jiang, B.; Davison, J.; Ketela, T.; Veillette, K.; Breton, A.; Tandia, F.; Linteau, A.; Sillaots, S.; Marta, C.; et al. Large-Scale Essential Gene Identification in *Candida Albicans* and Applications to Antifungal Drug Discovery. *Mol. Microbiol.* **2003**, *50*, 167–181, doi:10.1046/j.1365-2958.2003.03697.x.
4. Zhao, X.; Oh, S.H.; Cheng, G.; Green, C.B.; Nuessen, J.A.; Yeater, K.; Leng, R.P.; Brown, A.J.P.; Hoyer, L.L. ALS3 and ALS8 Represent a Single Locus That Encodes a *Candida Albicans* Adhesin; Functional Comparisons between Als3p and Als1p. *Microbiology* **2004**, *150*, 2415–2428, doi:10.1099/mic.0.26943-0.
5. Lo, H.J.; Köhler, J.R.; Didomenico, B.; Loebenberg, D.; Cacciapuoti, A.; Fink, G.R. Nonfilamentous *C. Albicans* Mutants Are Avirulent. *Cell* **1997**, *90*, 939–949, doi:10.1016/S0092-8674(00)80358-X.

**Table S2:** Minimum inhibitory concentrations of EOs and Amp B against *C. albicans* background and knock-out strains.

| <b>C. <i>albicans</i><br/>Strains</b>   | <b>MIC (µg/mL)</b> |            |              |
|-----------------------------------------|--------------------|------------|--------------|
|                                         | <b>CNL</b>         | <b>CLV</b> | <b>Amp B</b> |
| SC5314                                  | 750 – 900          | 750 – 900  | 0.62         |
| <i>als1</i> Δ/Δ (1467)                  | 750 – 900          | 450 – 750  | 0.62         |
| <i>als3</i> Δ/Δ (1843)                  | 450 – 750          | 450 – 750  | 0.62         |
| <i>HLC67</i> ( <i>efg1</i> Δ/Δ)         | 225 – 375          | 375 – 450  | 0.62         |
| <i>hwp1</i> Δ/ <i>HWP1</i> <sup>+</sup> | 375 – 450          | 375 – 450  | 0.31         |
